1 Persistence of Zika virus RNA in the epididymis of the male reproductive tract

2

3 Short title: Persistent Zika infection of the epididymis

4

5 Megan B. Vogt<sup>1</sup>, Francesca Frere<sup>1</sup>, Seth A. Hawks<sup>1</sup>, Claudia E. Perez<sup>1</sup>, Sheryl Coutermarsh-

6 Ott<sup>1</sup>, Nisha K. Duggal<sup>1\*</sup>

7

8 <sup>1</sup> Department of Biomedical Sciences and Pathobiology, Virginia-Maryland College of Veterinary

9 Medicine, Virginia Polytechnic Institute and State University, Blacksburg, Virginia, United States

10 of America

11

12 \* Corresponding author

13 E-mail: [nduggal@vt.edu](mailto:nduggal@vt.edu)

14 **ABSTRACT**

15 Zika virus (ZIKV) can infect developing fetuses *in utero* and cause severe congenital defects.  
16 This *in utero* transmission can occur following ZIKV infection during pregnancy via sexual  
17 transmission or mosquito bite. Infected men may shed ZIKV RNA in semen for over six months  
18 post symptom onset, indicating that ZIKV may persistently infect the male reproductive tract  
19 (MRT). However, the site of persistent infection in the MRT and whether ZIKV can recrudescence in  
20 the MRT is unknown. We hypothesized that if ZIKV establishes a persistent infection in the  
21 MRT, then immunosuppressant treatment should stimulate ZIKV replication. We tested this  
22 hypothesis in a wild-type mouse model of ZIKV sexual transmission. Male mice were infected  
23 with ZIKV and immunosuppressed when they no longer shed infectious virus in their ejaculates.  
24 After immunosuppression, ejaculates and MRT tissues were monitored for infectious virus and  
25 ZIKV RNA. Our results show that ZIKV recrudescence did not occur following  
26 immunosuppression, as we did not detect significant levels of infectious virus in ejaculates or  
27 MRT tissues following immunosuppression. We did detect ZIKV RNA in the epididymides of  
28 mice treated with the immunosuppressant cyclophosphamide. Further analysis revealed that  
29 this ZIKV RNA was contained within the lumen of the epididymis. Our findings suggest that  
30 ZIKV persistently infects the epididymis within the male reproductive tract. This study provides  
31 insight into the mechanisms behind ZIKV sexual transmission, which may inform public health  
32 decisions regarding ZIKV risks.

33 **Importance**

34 Zika virus (ZIKV) is an emerging mosquito-transmitted virus that typically causes mild and self-  
35 limiting febrile illness in humans; however, during the recent epidemic of ZIKV in the Americas,  
36 severe birth defects, such as microcephaly and club foot, were reported in infants born to ZIKV  
37 infected mothers. Additionally, sexual transmission has been identified as a secondary method  
38 of ZIKV transmission. Since ZIKV can be isolated from semen of infected men long after initial

39 infection, it is imperative to understand the mechanism(s) of ZIKV infection of the male  
40 reproductive tract to prevent sexual transmission and ZIKV-associated birth defects. The  
41 significance of our research is in identifying a site of persistent ZIKV infection in the male  
42 reproductive tract and in assessing the likelihood that a persistently infected individual will begin  
43 shedding infectious virus in semen again. This information will enhance our understanding of  
44 ZIKV sexual transmission and inform health decisions regarding ZIKV risks.

## 45 INTRODUCTION

46 Zika virus (ZIKV; *Flaviviridae* family, flavivirus genus) can cause severe birth defects,  
47 such as microcephaly and club foot, in infants born to mothers infected with ZIKV during  
48 pregnancy. These birth defects are collectively termed congenital Zika syndrome and occur in  
49 approximately 5-15% of ZIKV-infected pregnancies [1-4]. ZIKV is typically transmitted by the  
50 bite of an infected *Aedes* spp. mosquito (*Ae. aegypti* or *Ae. albopictus*), but sexual transmission  
51 of ZIKV was reported during the most recent epidemic [5-9]. Mathematical modelling estimates  
52 that sexual transmission accounted for 3-23% of ZIKV transmission in areas with ZIKV-infected  
53 mosquitoes [10-12]. Furthermore, *in vivo* in mice studies indicate that maternal ZIKV infection  
54 via sexual transmission results in higher viral titers in fetal tissue compared to maternal ZIKV  
55 infection via subcutaneous injection, a route of infection that resembles a mosquito bite [13].  
56 Therefore, it is critical that we understand the mechanisms behind ZIKV sexual transmission to  
57 reduce ZIKV transmission potential and ultimately prevent serious sequelae, such as ZIKV  
58 congenital syndrome.

59 ZIKV-infected men may shed infectious ZIKV and ZIKV RNA for weeks or even months  
60 post infection, potentially increasing the amount of time that they are infectious compared to  
61 mosquito transmission [14-18]. Infectious ZIKV has been isolated from the semen of infected  
62 men for up to 38 days post onset of symptoms [17]. Additionally, ZIKV RNA has been isolated  
63 from semen for over 6 months post symptom onset [18]. Semen is derived from the major  
64 internal components of the MRT, which function to produce sperm (testes), mature and store  
65 sperm (epididymis) and contribute nutrients, fluids, and other non-cellular components of semen  
66 (seminal vesicles and prostate). Acute ZIKV infection of these tissues has been observed in  
67 human explant or cell culture models (testes and prostate), mouse models (testes,  
68 epididymides, and seminal vesicles), and non-human primate models (testes and prostate) [19-  
69 25]. However, persistent ZIKV infection of any of these tissues has yet to be verified.

70 Persistent infections with flaviviruses are not uncommon. In fact, several of the  
71 encephalitic flaviviruses, such as West Nile virus, Japanese encephalitis virus, and tick-borne  
72 encephalitis virus, can persistently infect humans, with infectious virus and viral RNA being  
73 isolated months to years after the initial symptomatic infection [26-30]. Persistent infections of  
74 flaviviruses can be evaluated using *in vivo* models by treating subjects with an  
75 immunosuppressant following convalescence and monitoring for viral replication [31-33]. In a  
76 mouse model of West Nile virus infection, viral replication was observed in the central nervous  
77 system post treatment with the immunosuppressant cyclophosphamide [31].

78 Our goal in this study was to determine whether ZIKV establishes a persistent infection  
79 in the MRT by testing whether immunosuppression could trigger recrudescence of seminal  
80 shedding of infectious ZIKV. We used a mouse model of ZIKV sexual transmission that  
81 replicates the kinetics of ZIKV shedding in human semen [19, 20]. Following acute infection,  
82 male mice were treated with one of a panel of immunosuppressants chosen for their varying  
83 mechanisms of action, and viral replication in the MRT was assessed. We were unable to detect  
84 infectious virus or an increase in viral RNA in ejaculates following immunosuppression. Low  
85 levels of infectious virus were detected in the testes and epididymides in some mice treated with  
86 certain immunosuppressants. Lastly, an increase in viral RNA was detected in the epididymides  
87 of mice treated with cyclophosphamide. These results suggest that ZIKV infection does  
88 establish a persistent infection within the MRT, specifically in the epididymis; however, we were  
89 unable to determine whether recrudescence in the MRT can lead to additional shedding of  
90 infectious virus in ejaculates.

## 91 **METHODS**

### 92 **Virus strains and cells**

93 Zika virus strain DakAr41524 was used for this study. This strain was isolated in Senegal  
94 in 1984 and has since been passaged seven times (AP-61 (*Aedes pseudoscutellaris*) cells p1,  
95 C6/36 (*Aedes albopictus*) cells p2, Vero cells p3-7). This strain has been used in studies  
96 investigating sexual transmission of ZIKV and can infect mouse testes, epididymides, and  
97 seminal vesicles *in vivo*. Additionally, mice infected with this strain shed ZIKV in ejaculates [20].

98 Vero cells (for plaque assay) were cultured in Dulbecco's modified Eagle's medium  
99 (DMEM) with 5% fetal bovine serum (FBS), 100units/mL penicillin (Gibco), and 100µg/mL  
100 streptomycin (Gibco).

### 101 **Mouse inoculations and immunosuppression**

102 Twelve-week-old male C57BL/6J were obtained from the Jackson Laboratory. Mice were  
103 allowed to acclimate in an ABSL-2 facility for one day before initial immunosuppression. Mice  
104 were rendered susceptible to ZIKV infection via intraperitoneal (i.p.) injection of 2mg of  $\alpha$ -  
105 IFNAR1 antibody (Mar1-5A3; Leinco Technologies) [20, 34-36]. The following day mice were  
106 infected with either  $10^3$  (cyclophosphamide) or  $10^4$  (remaining drug treatments) PFU of ZIKV via  
107 subcutaneous (s.c.) injection in a rear footpad. On days 1 and 4 post infection, mice were given  
108 additional doses of 0.5mg of  $\alpha$ -IFNAR1 antibody via i.p. injection [20, 35]. Mice were weighed  
109 daily to monitor clinical signs of infection. Any mouse whose weight dropped below 85% of the  
110 starting weight was humanely euthanized. Blood was collected from the submandibular vein into  
111 serum collection tubes on days 3, 5, and 7 post infection. Serum was separated via  
112 centrifugation at 10,000 x g for 5 minutes and was stored at -80°C. To collect ejaculate samples,  
113 male mice were paired with 1 to 2 CD-1 female mice (Charles River) each night beginning at  
114 day 5 post infection. Female mice were checked each morning for evidence of copulation plug.  
115 Females who successfully mated were humanely euthanized, and their uteri were dissected out

116 and flushed with BA-1 diluent (1X M199 Hank's Salts (Sigma), 0.005M Tris-HCL pH7.5 (Gibco),  
117 1% Bovine Serum Albumin (v/v; Probumin; Millipore), 2mM L-glutamine (Gibco), 0.35g/L  
118 Sodium Bicarbonate (Gibco), 100 units/mL Penicillin (Gibco), 100ug/mL streptomycin (Gibco),  
119 and 1ug/mL Amphotericin B (Hyclone)) to collect the ejaculate.

120 After male mice cleared the initial infection, as evidenced by weight gain and lack of  
121 infectious ZIKV in serum and ejaculate samples (via plaque assay), mice were  
122 immunosuppressed via cyclophosphamide, dexamethasone, ketoconazole/cyclosporine,  
123 methylprednisolone acetate, or  $\alpha$ -IFNAR1 antibody. Cyclophosphamide (Sigma), dissolved in  
124 PBS, was administered at 5mg/mouse via i.p. injection on days 31 and 36 post infection. Water-  
125 soluble dexamethasone (Sigma), dissolved in PBS, was administered at 1mg/kg via oral gavage  
126 daily from dpi 32-42. Ketoconazole (Sigma), dissolved in peanut oil (Sigma), was administered at  
127 10 mg/kg via oral gavage daily from dpi 32-42. Cyclosporine (Sigma), dissolved in DMSO  
128 (ATCC) and diluted in PBS, was administered at 30 mg/kg via i.p. injection daily from dpi 32-42.  
129 Methylprednisolone acetate (Zoetis) was administered at 600 mg/kg via s.c. injection on the  
130 back on day 32 post infection.  $\alpha$ -IFNAR1 antibody, diluted in PBS, was administered at 2 mg  
131 per mouse via i.p injection on day 32 post infection and 0.5 mg per mouse via i.p. injection on  
132 days 34 and 37 post infection. Mice infected with either  $10^3$  or  $10^4$  PFUs that received PBS via  
133 i.p. injection on days 32, 34, and 37 post infection served as controls.

134 Male mice were humanely euthanized ten days after immunosuppression. Blood was  
135 collected via submandibular vein or intracardiac bleed. Serum was separated and stored as  
136 described above. Testes, epididymides, and seminal vesicles were dissected out of each  
137 mouse. One set of reproductive tissues from each mouse was preserved in neutral buffered  
138 formalin for later ISH and H&E analysis, while remaining tissues were frozen at  $-80^{\circ}\text{C}$  for later  
139 virus quantification.

#### 140 **Quantification of infectious virus**

141 Infectious virus was quantified via Vero cell plaque assay. Briefly, tissues from mice  
142 were weighed, and an equal volume of BA-1 diluent was added to each sample. One 5mm  
143 stainless steel bead was added to each sample, and tissues were homogenized using a  
144 TissueLyserLT (Qiagen) set to 5 oscillations/s for 2 minutes. Tissue samples were clarified via  
145 centrifugation at 19,000g for 3 minutes.

146 Serum, ejaculate, and clarified tissue samples were serially diluted in BA-1 diluent.  
147 These dilutions were plated on confluent Vero cells and incubated at 37°C, 5% CO<sub>2</sub> for 1 hour,  
148 with gentle rocking every 15 minutes. Following incubation, Vero cells were overlaid with Miller's  
149 Ye-Lah agarose overlay (2X Ye-Lah media (0.132% yeast extract (w/v), 0.66% lactalbumin  
150 hydrolysate (w/v), 10X Earle's Balanced Salt Solution, 2% Fetal Bovine Serum (v/v),  
151 Amphotericin B, Gentamycin), 1.6% agarose (w/v), and 0.225% sodium bicarbonate (v/v)). A  
152 second overlay containing neutral red (1:300) was added four days later. Plaques were counted  
153 the following day. The limit of detection is 2 log<sub>10</sub> PFU/mL serum, 0.4 log<sub>10</sub> PFU/ejaculate, and  
154 0.4 log<sub>10</sub> PFU/organ.

#### 155 **Quantification of viral RNA**

156 Viral RNA was extracted from ejaculates and homogenized tissue samples using the  
157 QIAamp viral RNA mini kit (Qiagen). Briefly, 70µL sample was diluted 1:2 in 10µM dithiothreitol  
158 (DTT; Pierce) to denature seminal proteins. Samples were lysed in 560µL buffer AVL with linear  
159 acrylamide added (1µg per sample). The extraction was continued following the manufacturer's  
160 protocol. Viral RNA was eluted in 60µL nuclease-free water (Qiagen) and stored at -80C.

161 Viral RNA was quantified via a one-step qRT-PCR using the iTaq universal probes  
162 one-step kit (Bio-Rad) per the manufacturer's instructions for a 20µL reaction, with the exception  
163 that the quantity of reverse transcriptase per reaction was halved. Five microliters of RNA were  
164 used per reaction. ZIKV specific primers and probes were synthesized by IDT using 6-Fam as  
165 the reporter dye and Zen/Iowa Black as the quencher. Primer and probe sequences and cycling  
166 conditions are as previously described [37]. The amplification product is an approximately 75bp



167 region of the envelope protein. Viral RNA concentration was determined via an absolute  
168 standard curve of *in vitro* transcribed RNA standards from a plasmid containing a segment of  
169 the ZIKV envelope gene [20, 37]. The limit of detection for this assay was 1 RNA copy per  
170 reaction, 2 log<sub>10</sub> RNA copies per ejaculate, or 1.5 log<sub>10</sub> RNA copies per organ.

### 171 **Visualization of viral proteins within tissues via immunohistochemistry (IHC)**

172 Testes, epididymides, and seminal vesicles were collected from male mice upon  
173 euthanasia and fixed and stored in 10% buffered formalin. Tissues were paraffin-embedded,  
174 and 5µM slices were attached to charged, glass slides. Tissues were deparaffinized by  
175 submersion of slides in Xylenes (Fisher Scientific) followed by submersion in decreasing  
176 concentrations of ethanol (Fisher Scientific). Antigen retrieval was performed by submersion in  
177 10mM sodium citrate buffer at 91 to 95°C for 30 minutes. After cooling, tissues were stained  
178 using the Peroxidase IHC Detection Kit (Pierce), per the manufacturer's protocol. Primary  
179 antibody was anti-ZIKV NS2B (GeneTex GTX133308) and secondary antibody was goat anti-  
180 rabbit conjugated to horseradish peroxidase (Invitrogen). Both antibodies were diluted 1:500 in  
181 universal blocking buffer (Pierce) before use. Positive staining (brown) was detected using DAB  
182 substrate (Pierce). Nuclei were counterstained (positive) using Harris-modified hematoxylin  
183 (Pierce) for two minutes. Tissues from uninfected mice served as negative controls, while  
184 tissues from mice who succumbed to ZIKV were used as positive controls.

### 185 **Visualization of viral RNA within tissues via In Situ Hybridization (ISH)**

186 Tissues were collected and processed as for IHC. ISH was performed using the view  
187 RNA ISH Tissue Assay (Invitrogen) per the manufacturer's instructions. Tissues underwent  
188 pretreatment and protease treatment for 10 minutes each [38]. A proprietary but publicly  
189 available probe set specific for positive sense ZIKV (Asian lineage) RNA was used  
190 (Thermofisher). Positive staining (red) was visualized via alkaline phosphatase labeled probes.  
191 Nuclei (blue) were counterstained via Gill's hematoxylin (American Master Tech Scientific) for 3

192 minutes. Tissues from uninfected and infected mice euthanized during acute infection served as  
193 negative and positive controls, respectively.

#### 194 **Histological analysis**

195 Tissues were collected and processed as for IHC. Slides were stained for Hematoxylin  
196 and Eosin (H&E) following normal procedures. Slides from infected mice euthanized before  
197 immunosuppression (dpi 31) and from uninfected mice treated with cyclophosphamide or PBS  
198 served as controls. Slides were analyzed by Sheryl Coutermarsh-Ott, DVM, PhD, Diplomate of  
199 the American College of Veterinary Pathologists (DACVP). Testes were assessed for  
200 degradation of tubule architecture, inflammation of interstitial spaces, and Leydig cell loss.  
201 Epididymides were assessed for epithelial damage and interstitial inflammation. Each of these  
202 factors were scored from 0 (no pathology) to 3 (severe pathology), and the scores from each of  
203 these subcategories were added together to achieve a total organ score.

#### 204 **Statistics**

205 Statistical analyses were performed using GraphPad Prism (v8.4.1). Weight data were  
206 analyzed using repeated measures analysis of variance (ANOVA) with multiple comparisons  
207 t-tests using Tukey correction. Infectious virus and viral RNA concentrations in ejaculates were  
208 assessed via multiple comparisons t-tests using the Holm-Sidak correction. Correlations were  
209 assessed via Spearman correlation coefficient (ZIKV RNAc in epididymis vs. peak ZIKV RNAc  
210 in the ejaculates or number of matings), Mann-Whitney rank sum test (ISH results vs. ZIKV  
211 RNAc in epididymis, number of matings, viremia at 3 dpi, or viremia at 5 dpi).

#### 212 **Ethics statement**

213 All animal experiments were approved by the Institutional Animal Care and Use  
214 Committee at Virginia Polytechnic Institute and State University (IACUC protocol 18-085) and  
215 followed the recommendations in the *Guide for the Care and Use of Laboratory Animals*, 8<sup>th</sup>  
216 edition (Institute for Laboratory Animal Research, National Research Council, National Academy  
217 of Sciences, 2011).

## 218 RESULTS

### 219 Immunosuppression following ZIKV infection does not lead to systemic recrudescence

220 To assess whether ZIKV can recrudescence in the MRT, C57BL/6J male mice pre-  
221 treated with an IFNAR blocking antibody were infected subcutaneously with ZIKV strain  
222 Dakar41524. Serum and ejaculates were monitored regularly for presence of infectious virus.  
223 When infectious virus was no longer shed in ejaculates (~30 dpi), male mice were treated with  
224 one of the following immunosuppressants chosen for their differing mechanisms of action:  
225 cyclophosphamide, IFNAR blocking antibody, methylprednisolone acetate, dexamethasone, or  
226 ketoconazole/cyclosporine. PBS treated mice served as a control. Post-immunosuppression,  
227 serum and ejaculates were collected regularly to assess for infectious virus. Mice were  
228 euthanized ten days post immunosuppression, and testes, epididymides, and seminal vesicles  
229 were collected and assessed for the presence of infectious virus (Figure 1a).

230 Mortality, morbidity, and viremia were monitored throughout the course of the study.  
231 During acute infection, there was a 20% mortality rate in mice infected with  $10^3$  PFUs of ZIKV  
232 and a 24% mortality rate in mice infected with  $10^4$  PFUs of ZIKV, with mortalities occurring  
233 between dpi 8 and 10. No mortalities occurred post-immunosuppression, regardless of the  
234 immunosuppressant used. On average, mice lost approximately 5% of their starting weight  
235 during acute infection and gained that weight back during the pre-immunosuppression phase  
236 (Figures 1B and 1C). Post-immunosuppression, there was significant weight loss in mice treated  
237 with cyclophosphamide (10% weight loss;  $p = 0.003$ ) and methylprednisolone acetate (9%  
238 weight loss;  $p=0.03$ ) compared to their respective PBS treated controls (2% weight loss);  
239 however, it is likely that this weight loss was due to the immunosuppressant agents themselves  
240 and not due to ZIKV recrudescence, no infectious virus was detected in serum post-  
241 immunosuppression, regardless of immunosuppressant treatment (Figures 1d and 1e). In  
242 contrast, infectious virus was present in serum at concentrations ranging from 3.6 to 6.7  $\log_{10}$   
243 PFUs/mL during acute infection. Taken together, these results confirm that mice were infected

244 with ZIKV experienced acute disease but did not develop systemic ZIKV recrudescence  
245 following immunosuppression.

246 **Figure 1: Treatment with immunosuppressants affects morbidity but not mortality or**  
247 **viremia in ZIKV-infected male mice.** Study design (a). Mouse weights were recorded daily  
248 (mean  $\pm$  standard deviation) PBS: n=6; Cyclophosphamide (b). Mouse weights PBS: n=5;  
249 Dexamethasone: n=4;  $\alpha$ -IFNAR antibody: n=4; Methylprednisolone acetate: n=4;  
250 Ketoconazole/Cyclosporine: n=4 (c). Infectious ZIKV in serum was quantified via plaque assay  
251 (d,e). Data points represent individual mice, horizontal lines represent group mean, and error  
252 bars represent standard deviation. Data were analyzed via repeated measures ANOVA.

253 \* p<0.05; \*\* p<0.01; \*\*\* p<0.005; \*\*\*\* p<0.001.

254 Abbreviations: DPI, days post inoculation; IS, immunosuppression; LOD, limit of detection.

255 **Immunosuppression does not increase concentration ZIKV in ejaculates of ZIKV infected**  
256 **male mice.**

257 To assess whether ZIKV recrudescence occurred in the MRT following  
258 immunosuppression, infectious virus was quantified in ejaculates via plaque assay (Figures 2a  
259 and 2b). During acute infection, male mice shed up to 6 log<sub>10</sub> PFU in ejaculates, with infectious  
260 virus cleared by twenty days post inoculation. No infectious virus was detected in ejaculates  
261 post immunosuppression regardless of immunosuppressant treatment. Next, ZIKV RNA levels  
262 were quantified in ejaculates via qRT-PCR (Figures 2c and 2d). ZIKV RNA was detected in  
263 ejaculates throughout the course of the entire study with the highest concentrations (5 to 6 log<sub>10</sub>)  
264 detected in samples collected during acute infection. To determine whether ZIKV RNA  
265 concentrations increased in ejaculates post-immunosuppression, samples were grouped based  
266 on collection time: 10 days pre-immunosuppression and 10 days post-immunosuppression  
267 (Figures 2G and 2H). ZIKV RNA levels in ejaculates from mice immunosuppressed with the

268  $\alpha$ -IFNAR antibody were significantly higher post-immunosuppression than those from  
269 pre-immunosuppression samples ( $p=0.03$ ). No other immunosuppressant treatments increased  
270 ZIKV RNA in ejaculates. There were no significant changes in ZIKV RNA levels in ejaculates  
271 pre- and post-immunosuppression in PBS treated mice. Taken together, these data indicate that  
272 immunosuppression did not significantly increase infectious ZIKV in mouse ejaculates.

273 **Figure 2: ZIKV RNA but not infectious ZIKV are present in ejaculates from ZIKV-infected**  
274 **male mice treated with immunosuppressants.** Infectious ZIKV in ejaculate samples was  
275 quantified via plaque assay (**a,b**), and ZIKV RNA was quantified via qRT-PCR (**c,d**). For further  
276 analysis of qRT-PCR results, ejaculate samples were grouped based on the stage of infection in  
277 which they were collected (**e,f**): pre-immunosuppression (days 22-27) and post-  
278 immunosuppression (days 33-42). Each data point represents an individual sample, with lines  
279 and error bars representing the mean and standard deviation, respectively. Data were analyzed  
280 via two-way ANOVA followed by multiple comparisons t-tests using the Holm-Sidak correction.

281 \*  $p<0.05$ ; \*\*  $p<0.01$ ; \*\*\*  $p<0.005$ ; \*\*\*\*  $p<0.001$ .

282 Abbreviations: RNAc, RNA copies; LOD, limit of detection; IS, immunosuppression; ns, not  
283 significant.

#### 284 **Cyclophosphamide treatment significantly increases ZIKV RNA but not infectious virus** 285 **in epididymides**

286 Male reproductive tract tissues (testes, epididymides, and seminal vesicles) were  
287 collected from mice upon euthanasia, and infectious virus was quantified via plaque assay.  
288 Infectious virus was detected in reproductive tract tissues of mice who succumbed to acute  
289 ZIKV infection, confirming that ZIKV does infect MRT tissues during acute infection. Infectious  
290 virus was not detected in tissues from any of the mice treated with cyclophosphamide or PBS  
291 (Figures 3a and 3c). Infectious virus was detected at or near the limit of detection in the testes

292 of one mouse treated with dexamethasone and the epididymides of two mice treated with  
293 dexamethasone and two mice treated with methylprednisolone acetate (Figures 3b and 3d). We  
294 confirmed these results via immunohistochemistry using an antibody against ZIKV NS2B  
295 protein, and we were able to detect NS2B in 3 out of the 7 samples that were positive via plaque  
296 assay.

297 Levels of ZIKV RNA in MRT tissues were assessed via qRT-PCR (Figures 3e and 3f).  
298 ZIKV RNA was significantly higher in epididymides from mice treated with cyclophosphamide  
299 than from those treated with PBS ( $p < 0.001$ ). There were no significant changes in ZIKV RNA  
300 levels in tissues of mice treated with any of the other immunosuppressants compared to PBS  
301 controls. To confirm the presence of ZIKV RNA in the epididymides of cyclophosphamide  
302 treated mice, we performed *in situ* hybridization (ISH) against ZIKV RNA in the epididymides of  
303 cyclophosphamide and PBS treated mice (Figure 4). We detected ZIKV RNA via ISH in the  
304 epididymal lumen of 5 of the cyclophosphamide treated mice ( $n=10$ ) but in none of the  
305 epididymides from the PBS treated mice ( $n=3$ ). To ascertain whether ZIKV was actively  
306 replicating in these epididymides, we performed IHC against NS2B protein, but we were unable  
307 to detect ZIKV NS2B protein in epididymides with positive ISH results. Additionally, we  
308 performed correlation analyses to determine whether the positive ISH results were related to  
309 ZIKV titers throughout infection or other variables. There were no significant correlations  
310 between ZIKV RNA<sub>c</sub> in the epididymis and number of matings ( $p=0.33$ ), ISH results ( $p=0.23$ ), or  
311 ZIKV RNA<sub>c</sub> in the ejaculates ( $p=0.15$ ), as well as no significant correlation between ISH results  
312 and number of matings ( $p=0.94$ ), viremia at 3 dpi ( $p=0.27$ ), or viremia at 5 dpi ( $p=0.072$ ).

313 Sections of testis and epididymis were evaluated histologically for evidence of tissue  
314 damage and inflammation. In general, all ZIKV mice exhibited some degree of tissue pathology.  
315 In the testis, these changes ranged from moderate increases in interstitial lymphocytes and  
316 plasma cells to massive loss of seminiferous tubules with collapse of normal architecture. In the  
317 epididymis, these changes were less severe with mild infiltration of inflammatory cells and mild

318 to moderate degeneration and loss of epithelial cells. These changes were graded  
319 semi-quantitatively to produce a total histologic score. There were no significant differences in  
320 histologic scores of testes ( $p=0.082$ ) or epididymides ( $p=0.86$ ) between cyclophosphamide and  
321 PBS treated ZIKV infected mice (Figure 4). No pathology was observed in testes or  
322 epididymides of uninfected mice treated with PBS or cyclophosphamide, indicating that  
323 cyclophosphamide treatment alone does not cause MRT pathologies. Severe testicular damage  
324 and mild to moderate epididymal damage were observed in tissues from mice euthanized  
325 immediately before immunosuppressant treatment, indicating that MRT pathology may have  
326 manifested before immunosuppressant treatment. Taken together, these results indicate that  
327 cyclophosphamide treatment increased ZIKV RNA in the epididymides, specifically in non-  
328 sperm cells within the lumen, and that cyclophosphamide treatment did not impact MRT tissue  
329 pathology.

330 **Figure 3: Infectious ZIKV and ZIKV RNA are present in male reproductive tract tissues of**  
331 **ZIKV-infected mice following treatment with select immunosuppressants.** Male  
332 reproductive tract tissue samples were collected from mice upon euthanasia (day 41-42).  
333 Tissues were homogenized, and infectious ZIKV was quantified via plaque assay (**a,b**). The  
334 number of samples that yielded positive plaque assay results were counted (**c,d**). ZIKV RNA  
335 copies were quantified via qRT-PCR (**e,f**). Each data point represents an individual sample, with  
336 lines and error bars representing the mean and standard deviation, respectively. Data were  
337 analyzed via two-way ANOVA followed by multiple comparisons t-tests using the Holm-Sidak  
338 correction.

339 \*  $p<0.05$ ; \*\*  $p<0.01$ ; \*\*\*  $p<0.005$ ; \*\*\*\*  $p<0.001$ .

340 Abbreviations: RNAc, RNA copies; LOD, limit of detection; ns, not significant.

341 **Figure 4: ZIKV RNA is present within the lumen of epididymides of cyclophosphamide**  
342 **treated mice.** Testes and epididymides from cyclophosphamide and PBS treated mice were  
343 assessed for ZIKV RNA via ISH. ZIKV RNA is stained red and nuclei are stained blue. The  
344 same tissues were also stained via H&E to assess histology Five out of 10 epididymides from  
345 cyclophosphamide mice and 0 out of 3 from PBS mice had positive ISH staining **(a)**. H&E slides  
346 were scored for total testicular or epididymal pathologies. Data are displayed as mean with error  
347 bars representing standard deviation **(b)**. Statistical analyses were assessed using the Mann-  
348 Whitney ranked sum test.  
349 \* p<0.05; \*\* p<0.01; \*\*\* p<0.005; \*\*\*\* p<0.001.



## 350 **DISCUSSION**

351           ZIKV infection in pregnant women can lead to severe congenital defects in the  
352 developing fetus. *in utero* ZIKV transmission can occur if the mother is infected via sexual or  
353 mosquito bite during pregnancy [39]. Since ZIKV RNA has been detected in human semen for  
354 six months post symptom onset [14, 15, 17, 18], we investigated whether ZIKV persists in the  
355 MRT and could recrudescence upon immunosuppressant treatment in a mouse model. We  
356 observed that immunosuppression did not stimulate systemic ZIKV recrudescence or  
357 resumption of shedding of infectious ZIKV in ejaculates. However, ZIKV RNA levels as detected  
358 by qRT-PCR were significantly increased in the epididymides of mice treated with the  
359 immunosuppressant cyclophosphamide compared to PBS-treated controls. Additionally, ZIKV  
360 RNA was visualized via ISH in in the extracellular, luminal contents of the epididymis of mice  
361 treated with cyclophosphamide. Rarely, we also identified them within degenerate cells within  
362 epididymis of these mice as well. Collectively, these results indicate that ZIKV infection may  
363 persist within the epididymis.

364           In humans, infectious ZIKV and ZIKV RNA have been isolated from ejaculates up to 38  
365 days and 370 days post symptom onset, respectively [17, 18, 40]. While this long period of ZIKV  
366 RNA shedding is likely a result of persistent infection in the MRT, the source of the ZIKV RNA in  
367 the MRT and the potential for further transmission are unknown. We hypothesized that  
368 immunosuppression after the acute phase of ZIKV infection would stimulate ZIKV replication in  
369 reservoirs within the MRT, if any exist. This method allowed us to identify the epididymis as a  
370 potential site for persistent ZIKV infection. In mouse models of ZIKV infection, the testes atrophy  
371 and sustain severe pathologies including loss of seminiferous tubule structures and interstitial  
372 cell populations [41-43], though these testicular pathologies have not been observed in human  
373 cases of ZIKV or in *ex vivo* ZIKV infections of human testicular explants [21]. We did observe  
374 testicular atrophy and pathology in mice in our study, and it is possible that ZIKV susceptible  
375 cells in these testes were eliminated due to these pathologies, preventing establishment of a

376 persistent infection in the testes. To better assess whether ZIKV establishes a persistent  
377 infection in the testes, a model organism that does not experience severe testicular pathologies  
378 following ZIKV infection, such as non-human primates, might need to be used [25, 44].  
379 However, our results indicate that immunosuppression is unlikely to result in the recurrence of  
380 infectious ZIKV in ejaculates. Following immunosuppression, we were unable to detect  
381 infectious ZIKV in ejaculates; however, we only assessed ejaculates for ten days post-  
382 immunosuppression. In a study of persistence of West Nile virus in a mouse model,  
383 recrudescence was detected in tissues fifteen days post cyclophosphamide treatment [31]. We  
384 were unable to investigate ZIKV recrudescence in ejaculates fifteen days post treatment  
385 because the collection of ejaculates became difficult. Given that many of the mice lost weight  
386 following immunosuppression, especially those treated with cyclophosphamide or  
387 methylprednisolone acetate, we speculated that immunosuppression caused the mice to feel  
388 unwell, which reduced mating.

389         The infection of the epididymis during acute ZIKV infection has been well characterized  
390 in a mouse model [38]. Infection begins in the head of epididymis and quickly spreads to the tail  
391 of the epididymis. Epididymal epithelial cells and luminal leukocytes were found to be the  
392 targets of ZIKV infection during acute infection. In our study, we did find ZIKV RNA in the  
393 epididymis, but it was primarily extracellular and only within luminal contents. While the  
394 epididymal epithelium was damaged, there was no evidence of epididymal epithelium infection  
395 post immunosuppression. Given that the epididymis functions, in part, as a storage for mature  
396 sperm before ejaculation, it is possible that the infected luminal cells we observed were not a  
397 result of persistent ZIKV infection but rather residual infected cells that had yet to clear the MRT.  
398 In humans, duration of ZIKV shedding in semen is inversely correlated with the frequency of  
399 ejaculation [18]. In our study, we found that there was no correlation between mating frequency  
400 and epididymal ZIKV RNA levels by qRT-PCR or ISH staining. Additionally, there were no  
401 correlations between ZIKV ISH staining and viremia titers, peak ejaculate RNA copies, or

402 epididymal RNA copies. These results indicate that ZIKV RNA in the epididymis is more likely a  
403 result of persistent ZIKV infection as opposed to residual infected cells in the epididymis. We  
404 attempted to validate this conclusion by performing IHC on these tissues for the viral protein  
405 NS2B, which is only present in cells with actively replicating ZIKV; however, we were unable to  
406 detect any NS2B in our samples.

407         Interestingly, we did identify ZIKV RNA rarely within cells within the lumen of epididymis  
408 of immunosuppressed mice. These cells were often degenerate and thus unable to be  
409 definitively identified solely on morphology. It is suspected, however, that these cells are likely  
410 macrophages or degenerate epithelial cells. Macrophages are present throughout the MRT in  
411 both the interstitial spaces of the testes and epididymis; however, macrophages rarely cross the  
412 blood testes barrier or the blood epididymis barrier (which serve to maintain immune-privileged  
413 sites for sperm development and maturation) in healthy individuals [45-47]. ZIKV infection may  
414 disrupt these barriers in the MRT, allowing for macrophages to enter the seminiferous tubules of  
415 either the testes or the epididymis [48, 49]; however, it is unknown whether macrophages are  
416 infected before or after entrance into these tubules. Degenerate epithelial cells are derived from  
417 epididymal epithelial cells that are sloughed into the lumen upon epithelial damage. Since ZIKV  
418 does infect the epithelium of the epididymis and causes epithelial damage [38, 50], infected  
419 degenerate epithelial cells within the epididymal lumen were likely infected before being  
420 sloughed off into the lumen. More work will need to be done to determine how ZIKV reaches the  
421 epididymis and establishes persistence. Additionally, we did not detect ZIKV RNA within sperm  
422 cells in the epididymis, indicating that a male with a persistent ZIKV infection may be able to  
423 safely conceive a child using *in vitro* fertilization or similar reproductive technologies where  
424 sperm cells are separated from the remainder of the semen.

425         The mechanisms of action of the various immunosuppressants used in this study may  
426 provide insights into how ZIKV establishes a persistent infection in the MRT and what immune  
427 responses are necessary to clear ZIKV from the MRT. The immunosuppressants used in this

428 study were chosen for their differing mechanisms of action, which are as follows: (1)  
429 cyclophosphamide induces apoptosis of rapidly dividing cells [31, 51]; (2)  $\alpha$ -IFNAR1 antibody  
430 inhibits the interferon response by preventing type 1 interferons from binding to their cognate  
431 receptors [34]; (3) the combination of ketoconazole and cyclosporine inhibits T cell activation  
432 [52-54]; (4) dexamethasone induces apoptosis of peripheral T cells and induction of an anti-  
433 inflammatory response [55-57]; and (5) methylprednisolone acetate decreases T cell and  
434 monocyte populations and induces an anti-inflammatory response [58]. In our study, we  
435 observed an increase in ZIKV RNA only in the epididymides of mice treated with  
436 cyclophosphamide. This implies that rapidly dividing cells (such as developing monocytes or  
437 macrophages or expanding T or B cell clonal populations) are important in the immune  
438 response to ZIKV in the MRT. Additionally, this indicates that peripheral T cells may not be  
439 important in the immune response to ZIKV in the MRT. Future studies will delve into the immune  
440 response to ZIKV in the MRT, specifically the epididymis.

441         The long-term impacts of ZIKV on the MRT are still largely unknown. The study  
442 presented here provides insights into the role of the epididymis in ZIKV infection and the  
443 mechanism of ZIKV persistence in the MRT. Additionally, this study provides the foundation for  
444 future studies on immune responses to viral infection in the MRT, particularly within the  
445 epididymis. Understanding how ZIKV infects and persists within the MRT may help explain the  
446 mechanisms behind ZIKV sexual transmission, allowing for increased knowledge of ZIKV  
447 transmission risk and reduced incidence of ZIKV congenital syndrome.

448 **ACKNOWLEDGEMENTS**

449 Funding for this project was provided by the NIAID (R21A142504). We thank VT Laboratory

450 Animal Research staff for contributions to animal husbandry and training for mouse procedures.

451 We thank the VT ViTALS lab for processing tissues for microscopy and performing H&E

452 staining.

453 **REFERENCES**

- 454 1. Honein MA, Dawson AL, Petersen EE, Jones AM, Lee EH, Yazdy MM, et al. Birth  
455 Defects Among Fetuses and Infants of US Women With Evidence of Possible Zika Virus  
456 Infection During Pregnancy. *JAMA*. 2017;317(1):59-68. Epub 2016/12/14. doi:  
457 10.1001/jama.2016.19006. PubMed PMID: 27960197.
- 458 2. Reynolds MR, Jones AM, Petersen EE, Lee EH, Rice ME, Bingham A, et al. Vital Signs:  
459 Update on Zika Virus-Associated Birth Defects and Evaluation of All U.S. Infants with  
460 Congenital Zika Virus Exposure - U.S. Zika Pregnancy Registry, 2016. *MMWR Morb Mortal*  
461 *Wkly Rep*. 2017;66(13):366-73. Epub 2017/04/07. doi: 10.15585/mmwr.mm6613e1. PubMed  
462 PMID: 28384133; PubMed Central PMCID: PMC5657905.
- 463 3. Shapiro-Mendoza CK, Rice ME, Galang RR, Fulton AC, VanMaldeghem K, Prado MV,  
464 et al. Pregnancy Outcomes After Maternal Zika Virus Infection During Pregnancy - U.S.  
465 Territories, January 1, 2016-April 25, 2017. *MMWR Morb Mortal Wkly Rep*. 2017;66(23):615-21.  
466 Epub 2017/06/16. doi: 10.15585/mmwr.mm6623e1. PubMed PMID: 28617773; PubMed Central  
467 PMCID: PMC5657842.
- 468 4. Smoots AN, Olson SM, Cragan J, Delaney A, Roth NM, Godfred-Cato S, et al.  
469 Population-Based Surveillance for Birth Defects Potentially Related to Zika Virus Infection - 22  
470 States and Territories, January 2016-June 2017. *MMWR Morb Mortal Wkly Rep*. 2020;69(3):67-  
471 71. Epub 2020/01/24. doi: 10.15585/mmwr.mm6903a3. PubMed PMID: 31971935; PubMed  
472 Central PMCID: PMC7367037 Journal Editors form for disclosure of potential conflicts of  
473 interest. No potential conflicts of interest were disclosed.
- 474 5. Foy BD, Kobylinski KC, Chilson Foy JL, Blitvich BJ, Travassos da Rosa A, Haddock AD,  
475 et al. Probable non-vector-borne transmission of Zika virus, Colorado, USA. *Emerg Infect Dis*.  
476 2011;17(5):880-2. Epub 2011/05/03. doi: 10.3201/eid1705.101939. PubMed PMID: 21529401;  
477 PubMed Central PMCID: PMC3321795.

- 478 6. Musso D, Roche C, Robin E, Nhan T, Teissier A, Cao-Lormeau VM. Potential sexual  
479 transmission of Zika virus. *Emerg Infect Dis.* 2015;21(2):359-61. Epub 2015/01/28. doi:  
480 10.3201/eid2102.141363. PubMed PMID: 25625872; PubMed Central PMCID:  
481 PMC4313657.
- 482 7. Hills SL, Russell K, Hennessey M, Williams C, Oster AM, Fischer M, et al. Transmission  
483 of Zika Virus Through Sexual Contact with Travelers to Areas of Ongoing Transmission -  
484 Continental United States, 2016. *MMWR Morb Mortal Wkly Rep.* 2016;65(8):215-6. Epub  
485 2016/03/05. doi: 10.15585/mmwr.mm6508e2. PubMed PMID: 26937739.
- 486 8. D'Ortenzio E, Matheron S, Yazdanpanah Y, de Lamballerie X, Hubert B, Piorkowski G,  
487 et al. Evidence of Sexual Transmission of Zika Virus. *N Engl J Med.* 2016;374(22):2195-8. Epub  
488 2016/04/14. doi: 10.1056/NEJMc1604449. PubMed PMID: 27074370.
- 489 9. Freour T, Mirallie S, Hubert B, Spingart C, Barriere P, Maquart M, et al. Sexual  
490 transmission of Zika virus in an entirely asymptomatic couple returning from a Zika epidemic  
491 area, France, April 2016. *Euro Surveill.* 2016;21(23). Epub 2016/06/18. doi: 10.2807/1560-  
492 7917.ES.2016.21.23.30254. PubMed PMID: 27311680.
- 493 10. Towers S, Brauer F, Castillo-Chavez C, Falconar AKI, Mubayi A, Romero-Vivas CME.  
494 Estimate of the reproduction number of the 2015 Zika virus outbreak in Barranquilla, Colombia,  
495 and estimation of the relative role of sexual transmission. *Epidemics.* 2016;17:50-5. Epub  
496 2016/11/16. doi: 10.1016/j.epidem.2016.10.003. PubMed PMID: 27846442.
- 497 11. Gao D, Lou Y, He D, Porco TC, Kuang Y, Chowell G, et al. Prevention and Control of  
498 Zika as a Mosquito-Borne and Sexually Transmitted Disease: A Mathematical Modeling  
499 Analysis. *Sci Rep.* 2016;6:28070. Epub 2016/06/18. doi: 10.1038/srep28070. PubMed PMID:  
500 27312324; PubMed Central PMCID: PMC4911567.
- 501 12. Counotte MJ, Kim CR, Wang J, Bernstein K, Deal CD, Broutet NJN, et al. Sexual  
502 transmission of Zika virus and other flaviviruses: A living systematic review. *PLoS Med.*  
503 2018;15(7):e1002611. Epub 2018/07/25. doi: 10.1371/journal.pmed.1002611. PubMed PMID:

- 504 30040845; PubMed Central PMCID: PMC6057622 following competing interests: Nicola  
505 Low receives a stipend as a Specialty Consulting Editor for PLOS Medicine, and serves on the  
506 journal's editorial board.
- 507 13. Duggal NK, McDonald EM, Ritter JM, Brault AC. Sexual transmission of Zika virus  
508 enhances in utero transmission in a mouse model. *Sci Rep.* 2018;8(1):4510. Epub 2018/03/16.  
509 doi: 10.1038/s41598-018-22840-6. PubMed PMID: 29540804; PubMed Central PMCID:  
510 PMC6057622.
- 511 14. Fontaine A, de Laval F, Belleoud D, Briolant S, Matheus S. Duration of Zika Viremia in  
512 Serum. *Clin Infect Dis.* 2018;67(7):1143-4. Epub 2018/04/05. doi: 10.1093/cid/ciy261. PubMed  
513 PMID: 29617955; PubMed Central PMCID: PMC6137117.
- 514 15. Mansuy JM, Mengelle C, Pasquier C, Chapuy-Regaud S, Delobel P, Martin-Blondel G,  
515 et al. Zika Virus Infection and Prolonged Viremia in Whole-Blood Specimens. *Emerg Infect Dis.*  
516 2017;23(5):863-5. Epub 2017/03/04. doi: 10.3201/eid2305.161631. PubMed PMID: 28257281;  
517 PubMed Central PMCID: PMC5403064.
- 518 16. Tesla B, Demakovsky LR, Packiam HS, Mordecai EA, Rodriguez AD, Bonds MH, et al.  
519 Estimating the effects of variation in viremia on mosquito susceptibility, infectiousness, and R0  
520 of Zika in *Aedes aegypti*. *PLoS Negl Trop Dis.* 2018;12(8):e0006733. Epub 2018/08/23. doi:  
521 10.1371/journal.pntd.0006733. PubMed PMID: 30133450; PubMed Central PMCID:  
522 PMC6122838.
- 523 17. Medina FA, Torres G, Acevedo J, Fonseca S, Casiano L, De Leon-Rodriguez CM, et al.  
524 Duration of the Presence of Infectious Zika Virus in Semen and Serum. *J Infect Dis.*  
525 2019;219(1):31-40. Epub 2018/07/31. doi: 10.1093/infdis/jiy462. PubMed PMID: 30059980.
- 526 18. Mead PS, Duggal NK, Hook SA, Delorey M, Fischer M, Olzenak McGuire D, et al. Zika  
527 Virus Shedding in Semen of Symptomatic Infected Men. *N Engl J Med.* 2018;378(15):1377-85.  
528 Epub 2018/04/12. doi: 10.1056/NEJMoa1711038. PubMed PMID: 29641964.



- 529 19. Duggal NK, Ritter JM, Pectorius SE, Zaki SR, Davis BS, Chang GJ, et al. Frequent Zika  
530 Virus Sexual Transmission and Prolonged Viral RNA Shedding in an Immunodeficient Mouse  
531 Model. *Cell Rep.* 2017;18(7):1751-60. Epub 2017/02/16. doi: 10.1016/j.celrep.2017.01.056.  
532 PubMed PMID: 28199846; PubMed Central PMCID: PMC5683178.
- 533 20. McDonald EM, Duggal NK, Delorey MJ, Oksanish J, Ritter JM, Brault AC. Duration of  
534 seminal Zika viral RNA shedding in immunocompetent mice inoculated with Asian and African  
535 genotype viruses. *Virology.* 2019;535:1-10. Epub 2019/06/30. doi: 10.1016/j.virol.2019.06.010.  
536 PubMed PMID: 31254742.
- 537 21. Matusali G, Houzet L, Satie AP, Mahé D, Aubry F, Couderc T, et al. Zika virus infects  
538 human testicular tissue and germ cells. *J Clin Invest.* 2018;128(10):4697-710. Epub 2018/07/31.  
539 doi: 10.1172/JCI121735. PubMed PMID: 30063220; PubMed Central PMCID:  
540 PMC6159993.
- 541 22. Kumar A, Jovel J, Lopez-Orozco J, Limonta D, Airo AM, Hou S, et al. Human Sertoli  
542 cells support high levels of Zika virus replication and persistence. *Sci Rep.* 2018;8(1):5477.  
543 Epub 2018/04/05. doi: 10.1038/s41598-018-23899-x. PubMed PMID: 29615760; PubMed  
544 Central PMCID: PMC5883016.
- 545 23. Spencer JL, Lahon A, Tran LL, Arya RP, Kneubehl AR, Vogt MB, et al. Replication of  
546 Zika Virus in Human Prostate Cells: A Potential Source of Sexually Transmitted Virus. *J Infect*  
547 *Dis.* 2018;217(4):538-47. Epub 2017/10/03. doi: 10.1093/infdis/jix436. PubMed PMID:  
548 28968863; PubMed Central PMCID: PMC5853941.
- 549 24. Halabi J, Jagger BW, Salazar V, Winkler ES, White JP, Humphrey PA, et al. Zika Virus  
550 Causes Acute and Chronic Prostatitis in Mice and Macaques. *J Infect Dis.* 2020;221(9):1506-17.  
551 Epub 2019/10/17. doi: 10.1093/infdis/jiz533. PubMed PMID: 31616920; PubMed Central  
552 PMCID: PMC7137895.
- 553 25. Peregrine J, Gurung S, Lindgren MC, Husain S, Zavy MT, Myers DA, et al. Zika Virus  
554 Infection, Reproductive Organ Targeting, and Semen Transmission in the Male Olive Baboon. *J*

- 555 Virol. 2019;94(1). Epub 2019/10/11. doi: 10.1128/JVI.01434-19. PubMed PMID: 31597777;  
556 PubMed Central PMCID: PMCPMC6912120.
- 557 26. Mlera L, Melik W, Bloom ME. The role of viral persistence in flavivirus biology. Pathog  
558 Dis. 2014;71(2):137-63. Epub 2014/04/17. doi: 10.1111/2049-632X.12178. PubMed PMID:  
559 24737600; PubMed Central PMCID: PMCPMC4154581.
- 560 27. Baty SA, Gibney KB, Staples JE, Patterson AB, Levy C, Lehman J, et al. Evaluation for  
561 West Nile Virus (WNV) RNA in urine of patients within 5 months of WNV infection. J Infect Dis.  
562 2012;205(9):1476-7. Epub 2012/03/23. doi: 10.1093/infdis/jis221. PubMed PMID: 22438324.
- 563 28. Murray K, Walker C, Herrington E, Lewis JA, McCormick J, Beasley DW, et al.  
564 Persistent infection with West Nile virus years after initial infection. J Infect Dis. 2010;201(1):2-4.  
565 Epub 2009/12/08. doi: 10.1086/648731. PubMed PMID: 19961306; PubMed Central PMCID:  
566 PMCPMC2791189.
- 567 29. Gritsun TS, Frolova TV, Zhankov AI, Armesto M, Turner SL, Frolova MP, et al.  
568 Characterization of a siberian virus isolated from a patient with progressive chronic tick-borne  
569 encephalitis. J Virol. 2003;77(1):25-36. Epub 2002/12/13. doi: 10.1128/jvi.77.1.25-36.2003.  
570 PubMed PMID: 12477807; PubMed Central PMCID: PMCPMC140615.
- 571 30. Sharma S, Mathur A, Prakash V, Kulshreshtha R, Kumar R, Chaturvedi UC. Japanese  
572 encephalitis virus latency in peripheral blood lymphocytes and recurrence of infection in  
573 children. Clin Exp Immunol. 1991;85(1):85-9. Epub 1991/07/01. doi: 10.1111/j.1365-  
574 2249.1991.tb05687.x. PubMed PMID: 1649022; PubMed Central PMCID: PMCPMC1535705.
- 575 31. Appler KK, Brown AN, Stewart BS, Behr MJ, Demarest VL, Wong SJ, et al. Persistence  
576 of West Nile virus in the central nervous system and periphery of mice. PLoS One.  
577 2010;5(5):e10649. Epub 2010/05/26. doi: 10.1371/journal.pone.0010649. PubMed PMID:  
578 20498839; PubMed Central PMCID: PMCPMC2871051.

- 579 32. Pogodina VV, Frolova MP, Malenko GV, Fokina GI, Koreshkova GV, Kiseleva LL, et al.  
580 Study on West Nile virus persistence in monkeys. Arch Virol. 1983;75(1-2):71-86. Epub  
581 1983/01/01. doi: 10.1007/BF01314128. PubMed PMID: 6299247.
- 582 33. Mathur A, Arora KL, Rawat S, Chaturvedi UC. Persistence, latency and reactivation of  
583 Japanese encephalitis virus infection in mice. J Gen Virol. 1986;67 ( Pt 2):381-5. Epub  
584 1986/02/01. doi: 10.1099/0022-1317-67-2-381. PubMed PMID: 3003242.
- 585 34. Sheehan KC, Lai KS, Dunn GP, Bruce AT, Diamond MS, Heutel JD, et al. Blocking  
586 monoclonal antibodies specific for mouse IFN-alpha/beta receptor subunit 1 (IFNAR-1) from  
587 mice immunized by in vivo hydrodynamic transfection. J Interferon Cytokine Res.  
588 2006;26(11):804-19. Epub 2006/11/23. doi: 10.1089/jir.2006.26.804. PubMed PMID: 17115899.
- 589 35. Smith DR, Hollidge B, Daye S, Zeng X, Blancett C, Kuszpit K, et al. Neuropathogenesis  
590 of Zika Virus in a Highly Susceptible Immunocompetent Mouse Model after Antibody Blockade  
591 of Type I Interferon. PLoS Negl Trop Dis. 2017;11(1):e0005296. Epub 2017/01/10. doi:  
592 10.1371/journal.pntd.0005296. PubMed PMID: 28068342; PubMed Central PMCID:  
593 PMCPMC5249252.
- 594 36. Lazear HM, Govero J, Smith AM, Platt DJ, Fernandez E, Miner JJ, et al. A Mouse Model  
595 of Zika Virus Pathogenesis. Cell Host Microbe. 2016;19(5):720-30. Epub 2016/04/14. doi:  
596 10.1016/j.chom.2016.03.010. PubMed PMID: 27066744; PubMed Central PMCID:  
597 PMCPMC4866885.
- 598 37. Lanciotti RS, Kosoy OL, Laven JJ, Velez JO, Lambert AJ, Johnson AJ, et al. Genetic  
599 and serologic properties of Zika virus associated with an epidemic, Yap State, Micronesia, 2007.  
600 Emerg Infect Dis. 2008;14(8):1232-9. Epub 2008/08/06. doi: 10.3201/eid1408.080287. PubMed  
601 PMID: 18680646; PubMed Central PMCID: PMCPMC2600394.
- 602 38. McDonald EM, Duggal NK, Ritter JM, Brault AC. Infection of epididymal epithelial cells  
603 and leukocytes drives seminal shedding of Zika virus in a mouse model. PLoS Negl Trop Dis.

- 604 2018;12(8):e0006691. Epub 2018/08/03. doi: 10.1371/journal.pntd.0006691. PubMed PMID:  
605 30070988; PubMed Central PMCID: PMC6091970.
- 606 39. Yarrington CD, Hamer DH, Kuohung W, Lee-Parritz A. Congenital Zika syndrome arising  
607 from sexual transmission of Zika virus, a case report. *Fertil Res Pract.* 2019;5:1. Epub  
608 2019/01/09. doi: 10.1186/s40738-018-0053-5. PubMed PMID: 30619616; PubMed Central  
609 PMCID: PMC6317256.
- 610 40. Barzon L, Percivalle E, Pacenti M, Rovida F, Zavattoni M, Del Bravo P, et al. Virus and  
611 Antibody Dynamics in Travelers With Acute Zika Virus Infection. *Clin Infect Dis.*  
612 2018;66(8):1173-80. Epub 2018/01/05. doi: 10.1093/cid/cix967. PubMed PMID: 29300893.
- 613 41. Uraki R, Hwang J, Jurado KA, Householder S, Yockey LJ, Hastings AK, et al. Zika virus  
614 causes testicular atrophy. *Sci Adv.* 2017;3(2):e1602899. Epub 2017/03/07. doi:  
615 10.1126/sciadv.1602899. PubMed PMID: 28261663; PubMed Central PMCID:  
616 PMC6321463.
- 617 42. Govero J, Esakky P, Scheaffer SM, Fernandez E, Drury A, Platt DJ, et al. Zika virus  
618 infection damages the testes in mice. *Nature.* 2016;540(7633):438-42. Epub 2016/11/01. doi:  
619 10.1038/nature20556. PubMed PMID: 27798603; PubMed Central PMCID: PMC632198.
- 620 43. Ma W, Li S, Ma S, Jia L, Zhang F, Zhang Y, et al. Zika Virus Causes Testis Damage and  
621 Leads to Male Infertility in Mice. *Cell.* 2016;167(6):1511-24 e10. Epub 2016/11/26. doi:  
622 10.1016/j.cell.2016.11.016. PubMed PMID: 27884405.
- 623 44. Kropp Schmidt JA, Mean KD, Puntney RC, Alexander ES, Sullivan R, Simmons HA, et  
624 al. Zika virus in rhesus macaque semen and reproductive tract tissues: a pilot study of acute  
625 infection. *Biol Reprod.* 2020. Epub 2020/08/08. doi: 10.1093/biolre/iaaa137. PubMed  
626 PMID: 32761051.
- 627 45. Mital P, Hinton BT, Dufour JM. The blood-testis and blood-epididymis barriers are more  
628 than just their tight junctions. *Biol Reprod.* 2011;84(5):851-8. Epub 2011/01/07. doi:

- 629 10.1095/biolreprod.110.087452. PubMed PMID: 21209417; PubMed Central PMCID:  
630 PMCPMC4574632.
- 631 46. Zhao S, Zhu W, Xue S, Han D. Testicular defense systems: immune privilege and innate  
632 immunity. *Cell Mol Immunol.* 2014;11(5):428-37. Epub 2014/06/24. doi: 10.1038/cmi.2014.38.  
633 PubMed PMID: 24954222; PubMed Central PMCID: PMCPMC4197207.
- 634 47. Li N, Wang T, Han D. Structural, cellular and molecular aspects of immune privilege in  
635 the testis. *Front Immunol.* 2012;3:152. Epub 2012/06/16. doi: 10.3389/fimmu.2012.00152.  
636 PubMed PMID: 22701457; PubMed Central PMCID: PMCPMC3371599.
- 637 48. Hui L, Nie Y, Li S, Guo M, Yang W, Huang R, et al. Matrix metalloproteinase 9 facilitates  
638 Zika virus invasion of the testis by modulating the integrity of the blood-testis barrier. *PLoS*  
639 *Pathog.* 2020;16(4):e1008509. Epub 2020/04/18. doi: 10.1371/journal.ppat.1008509. PubMed  
640 PMID: 32302362; PubMed Central PMCID: PMCPMC7190178.
- 641 49. Siemann DN, Strange DP, Maharaj PN, Shi PY, Verma S. Zika Virus Infects Human  
642 Sertoli Cells and Modulates the Integrity of the In Vitro Blood-Testis Barrier Model. *J Virol.*  
643 2017;91(22). Epub 2017/09/08. doi: 10.1128/JVI.00623-17. PubMed PMID: 28878076; PubMed  
644 Central PMCID: PMCPMC5660489.
- 645 50. Clancy CS, Van Wettere AJ, Siddharthan V, Morrey JD, Julander JG. Comparative  
646 Histopathologic Lesions of the Male Reproductive Tract during Acute Infection of Zika Virus in  
647 AG129 and Ifnar(-/-) Mice. *Am J Pathol.* 2018;188(4):904-15. Epub 2018/01/30. doi:  
648 10.1016/j.ajpath.2017.12.019. PubMed PMID: 29378173; PubMed Central PMCID:  
649 PMCPMC5955007.
- 650 51. Halford WP, Schaffer PA. Optimized viral dose and transient immunosuppression enable  
651 herpes simplex virus ICP0-null mutants To establish wild-type levels of latency in vivo. *J Virol.*  
652 2000;74(13):5957-67. Epub 2000/06/14. doi: 10.1128/jvi.74.13.5957-5967.2000. PubMed PMID:  
653 10846077; PubMed Central PMCID: PMCPMC112092.

- 654 52. Jivrajani M, Shaikh MV, Shrivastava N, Nivsarkar M. An improved and versatile  
655 immunosuppression protocol for the development of tumor xenograft in mice. *Anticancer Res.*  
656 2014;34(12):7177-83. Epub 2014/12/17. PubMed PMID: 25503146.
- 657 53. Matsuda S, Koyasu S. Mechanisms of action of cyclosporine. *Immunopharmacology.*  
658 2000;47(2-3):119-25. Epub 2000/07/06. doi: 10.1016/s0162-3109(00)00192-2. PubMed PMID:  
659 10878286.
- 660 54. Russell G, Graveley R, Seid J, al-Humidan AK, Skjodt H. Mechanisms of action of  
661 cyclosporine and effects on connective tissues. *Semin Arthritis Rheum.* 1992;21(6 Suppl 3):16-  
662 22. Epub 1992/06/01. doi: 10.1016/0049-0172(92)90009-3. PubMed PMID: 1502562.
- 663 55. Miller TA, Schaefer FW, 3rd. Changes in mouse circulating leukocyte numbers in  
664 C57BL/6 mice immunosuppressed with dexamethasone for *Cryptosporidium parvum* oocyst  
665 production. *Vet Parasitol.* 2007;149(3-4):147-57. Epub 2007/10/02. doi:  
666 10.1016/j.vetpar.2007.08.017. PubMed PMID: 17904293.
- 667 56. Coutinho AE, Chapman KE. The anti-inflammatory and immunosuppressive effects of  
668 glucocorticoids, recent developments and mechanistic insights. *Mol Cell Endocrinol.*  
669 2011;335(1):2-13. Epub 2010/04/20. doi: 10.1016/j.mce.2010.04.005. PubMed PMID:  
670 20398732; PubMed Central PMCID: PMC3047790.
- 671 57. Giles AJ, Hutchinson MND, Sonnemann HM, Jung J, Fecci PE, Ratnam NM, et al.  
672 Dexamethasone-induced immunosuppression: mechanisms and implications for  
673 immunotherapy. *J Immunother Cancer.* 2018;6(1):51. Epub 2018/06/13. doi: 10.1186/s40425-  
674 018-0371-5. PubMed PMID: 29891009; PubMed Central PMCID: PMC5996496.
- 675 58. Miller TA, Schaefer FW, 3rd. Characterization of a single dose methylprednisolone  
676 acetate immune suppression model using *Cryptosporidium muris* and *Cryptosporidium parvum*.  
677 *Vet Parasitol.* 2006;141(1-2):66-83. Epub 2006/06/08. doi: 10.1016/j.vetpar.2006.04.016.  
678 PubMed PMID: 16757117.
- 679

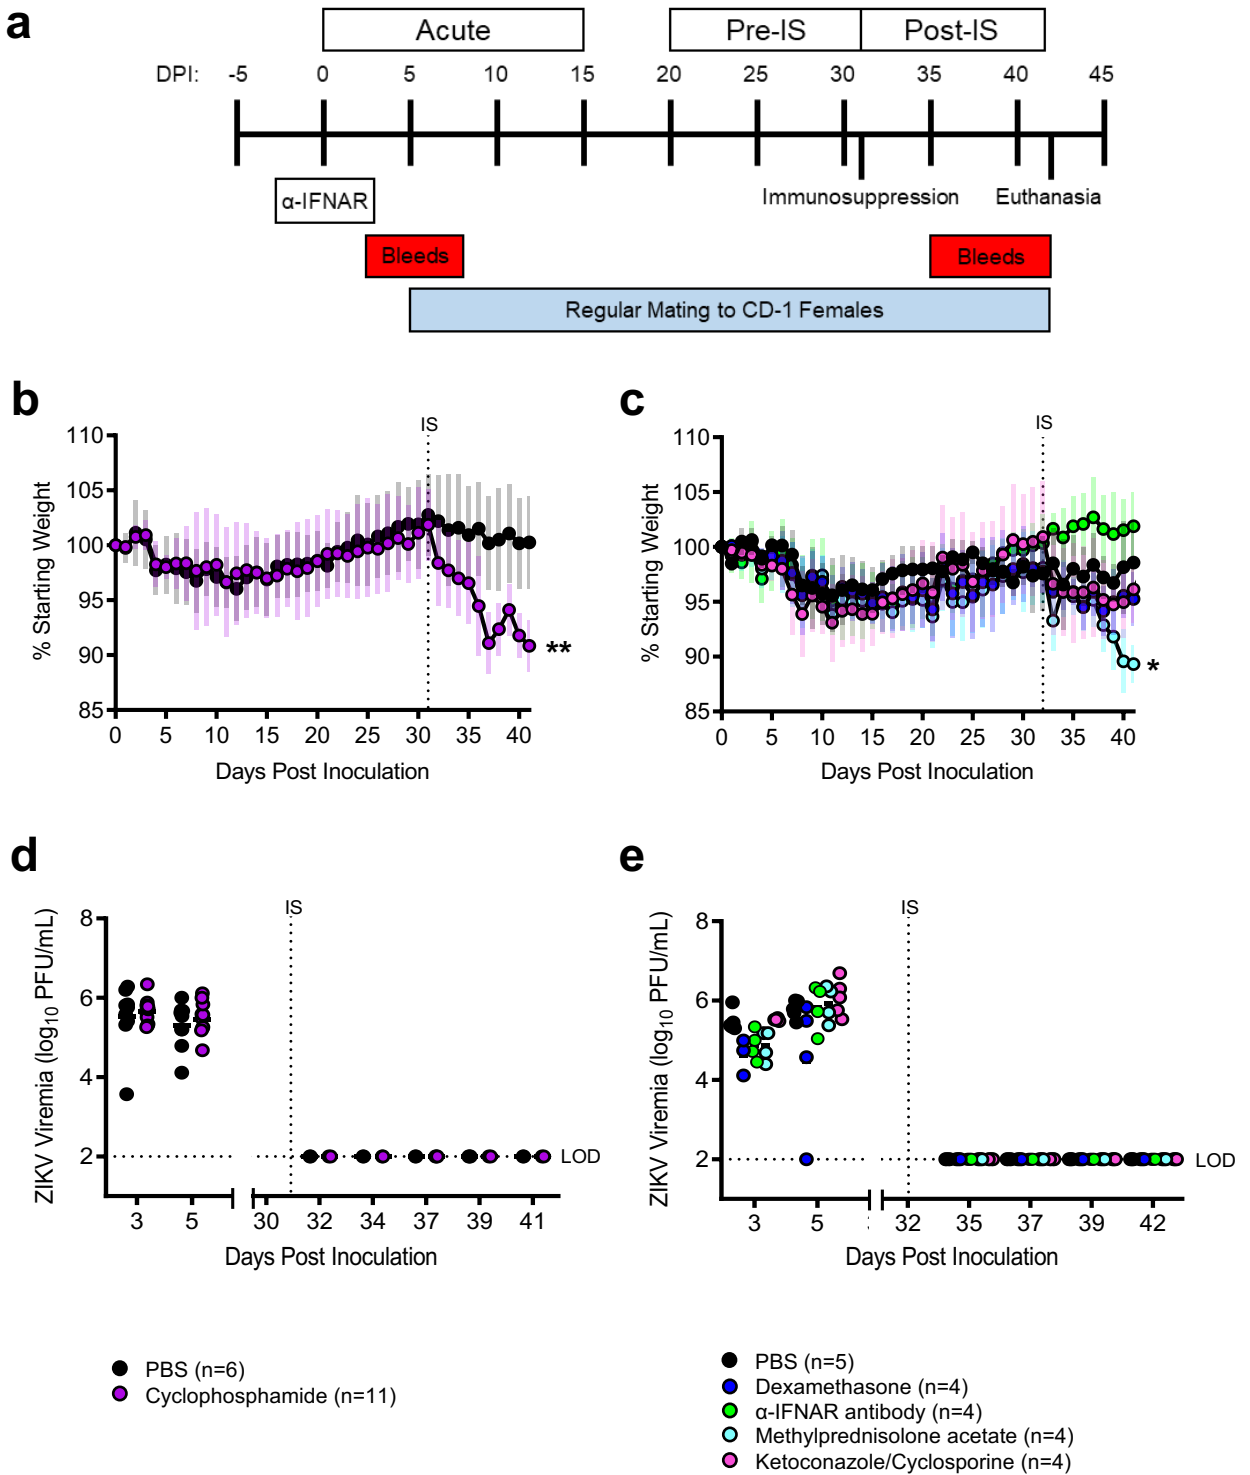

Figure 1

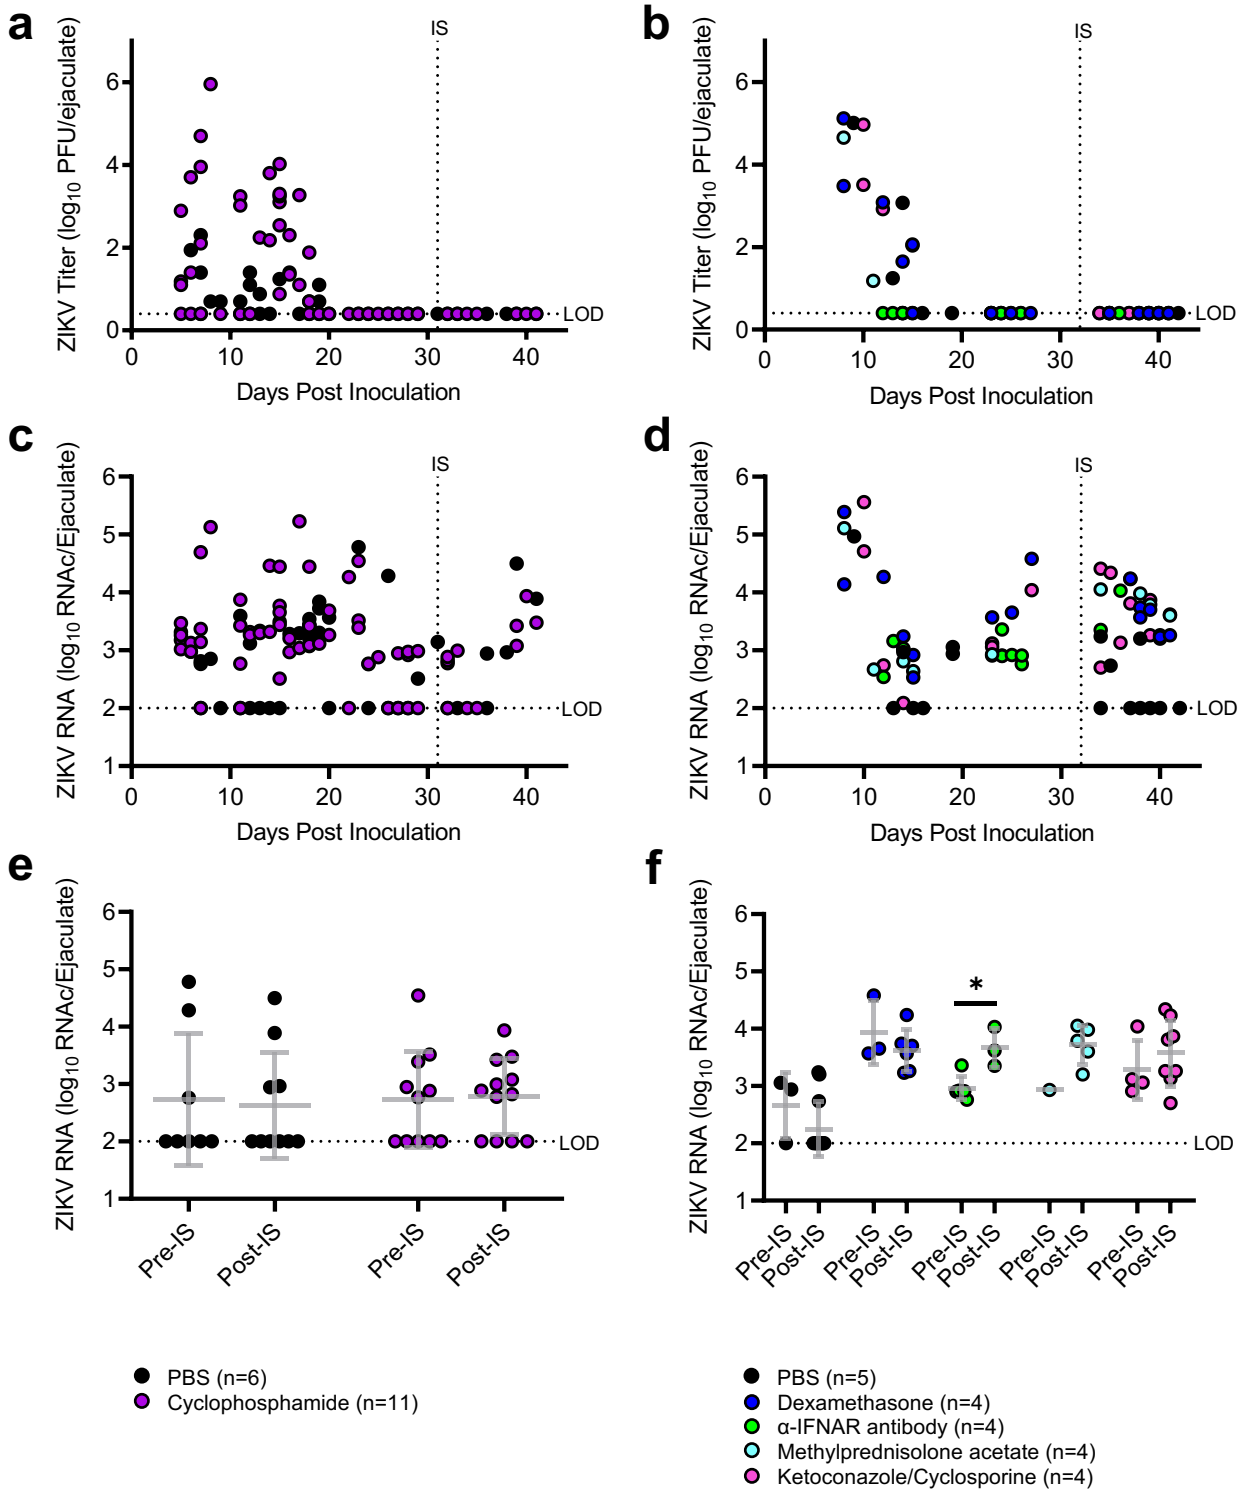

Figure 2



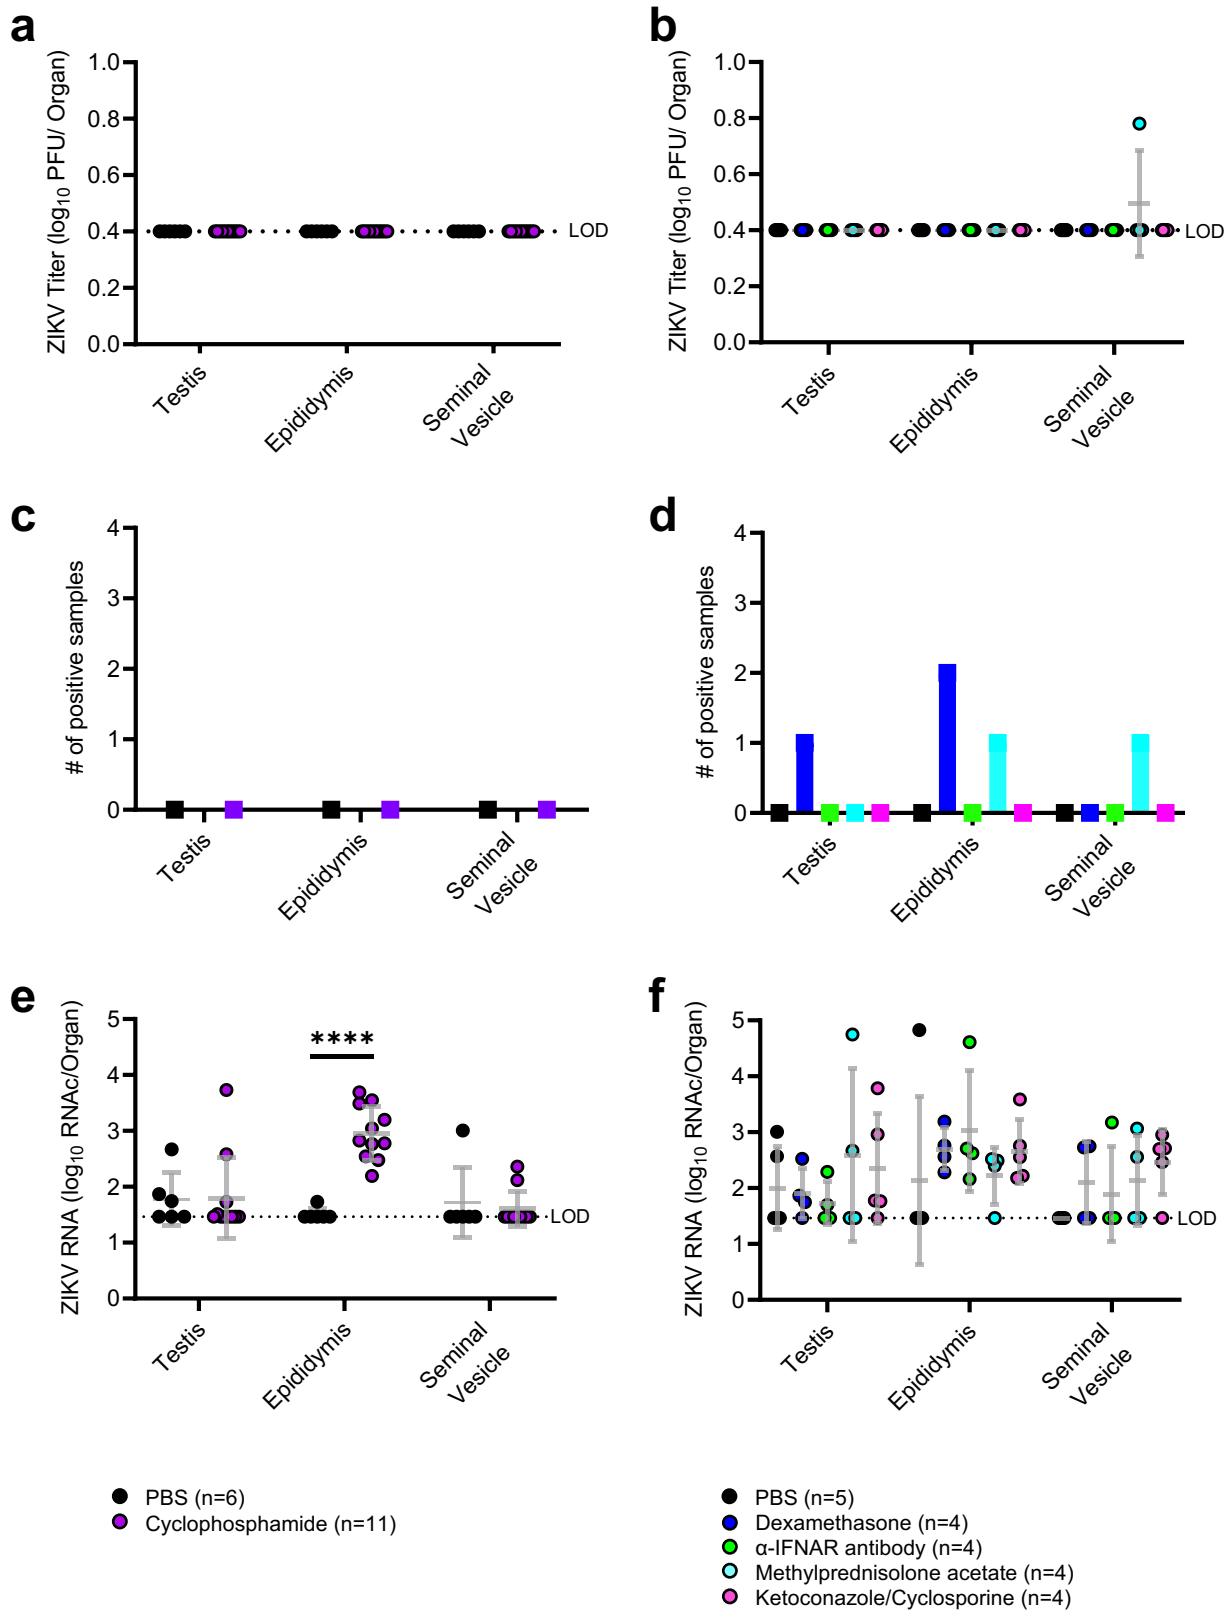

Figure 3

**A****ISH****H&E****Cyclophosphamide**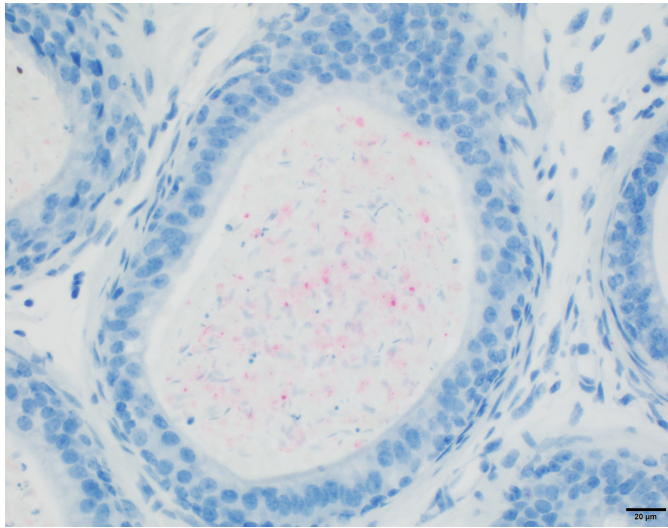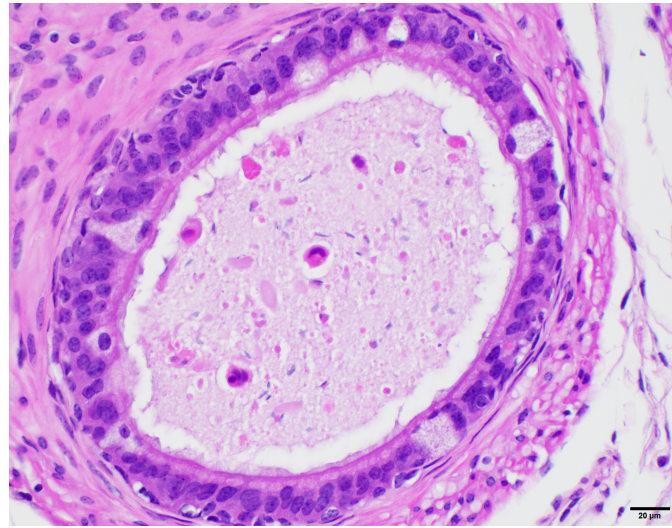**PBS**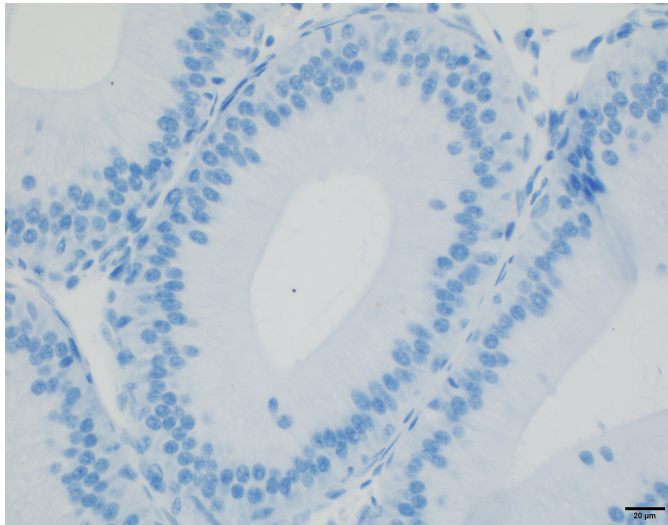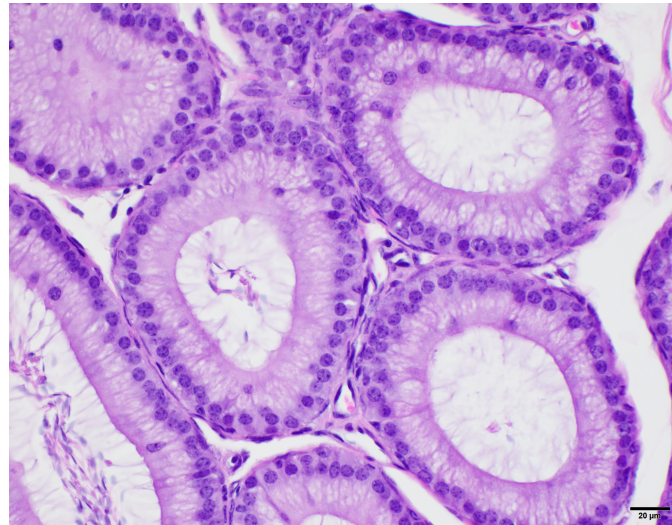**B**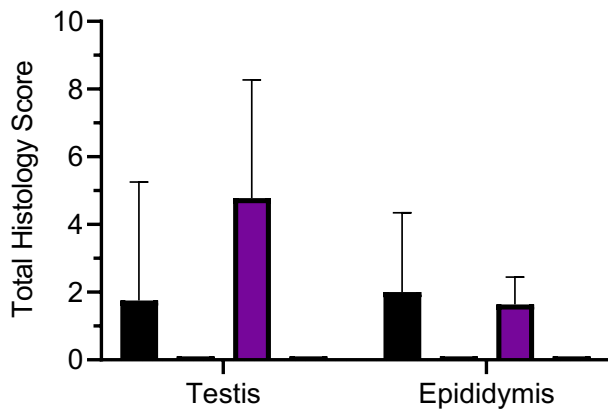

- PBS ZIKV Infected (n =4 testis; n=5 epididymis)
- PBS Uninfected (n=2 testis; n=1 epididymis)
- Cyclophosphamide ZIKV Infected (n=9 testis; n=11 epididymis)
- Cyclophosphamide Uninfected (n=2 testis; n=2 epididymis)

Figure 4
